# Supplementary material for: Repetitive Elements in Mycoplasma hyopneumoniae Transcriptional Regulation
Source: PubMed Central journal article supplement (PMC5179023; doi:10.1371/journal.pone.0168626), 2016-12-22
Supplement: pone.0168626.s001.pdf [file pone.0168626.s001.pdf]

Supplementary Fig. S1: Experimental validation through qPCR assay of tandem elements comparison.

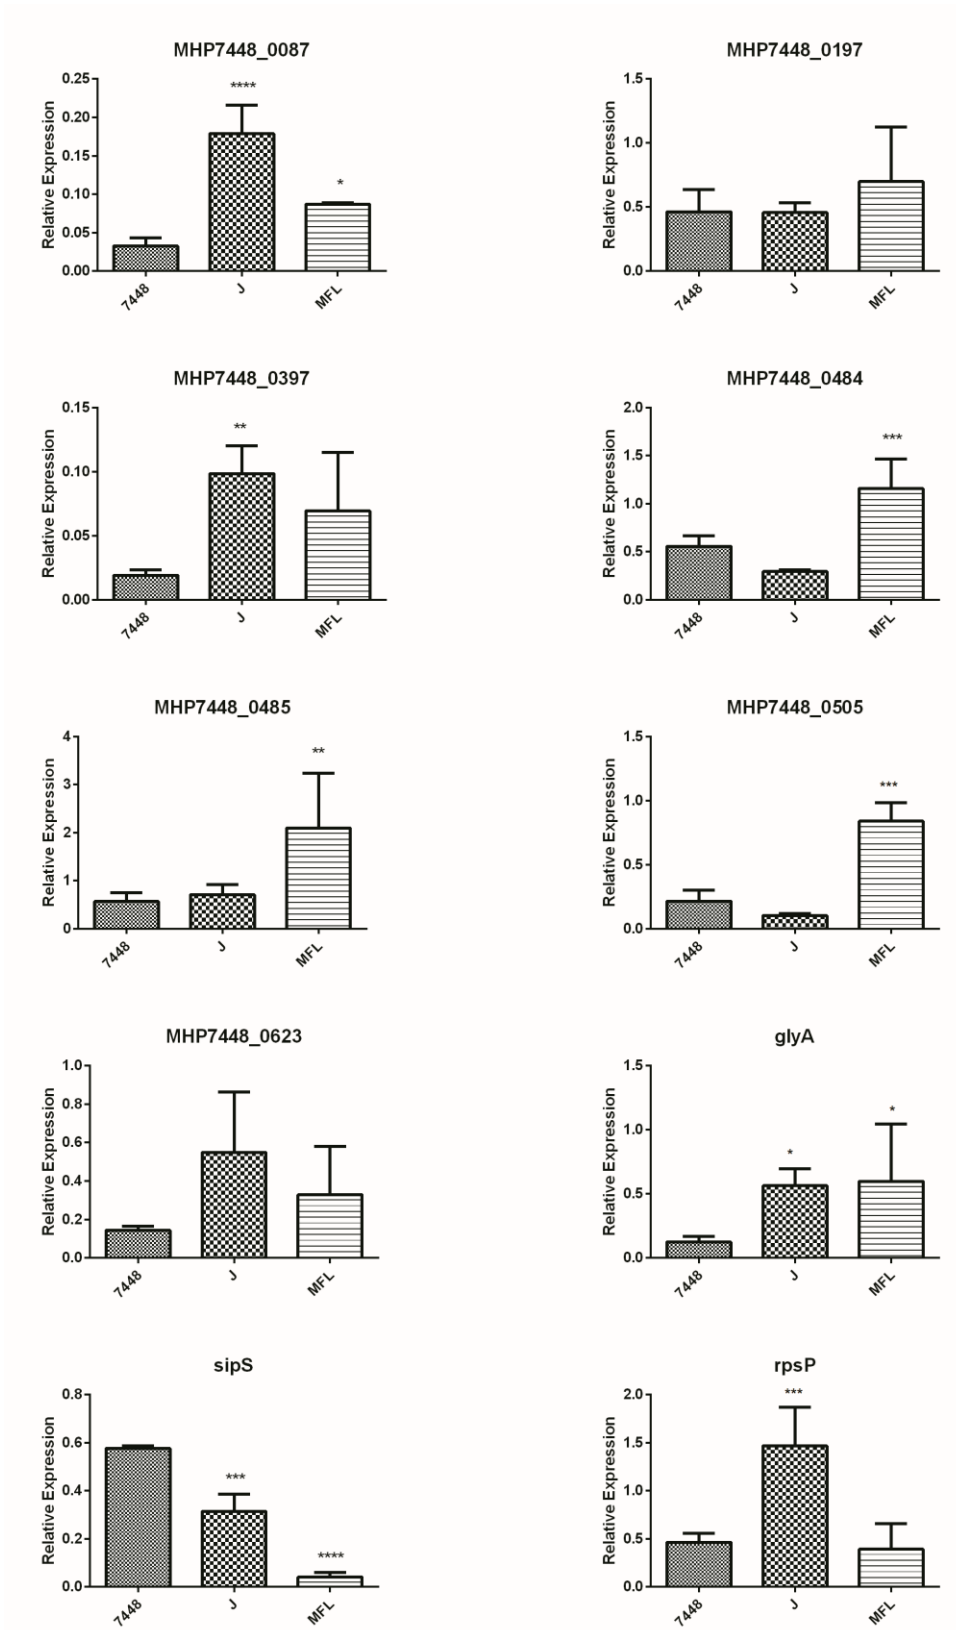

Asterisks indicate statistically significant differences in levels of expression, \*0.01 < P < 0.05, \*\*0.001 < P < 0.01, \*\*\*P < 0.001. Abrevitions: *M. hyopneumoniae* strain 7448 (7448); *M. hyopneumoniae* strain J (J) and *M. flocculare*.
