# Supplementary material for: Repetitive Elements in Mycoplasma hyopneumoniae Transcriptional Regulation
Source: PubMed Central journal article supplement (PMC5179023; doi:10.1371/journal.pone.0168626), 2016-12-22
Supplement: pone.0168626.s002.pdf [file pone.0168626.s002.pdf]

Supplementary Figure S2: Experimental validation through qPCR assay of palindrome elements comparison in adhesin coding genes.

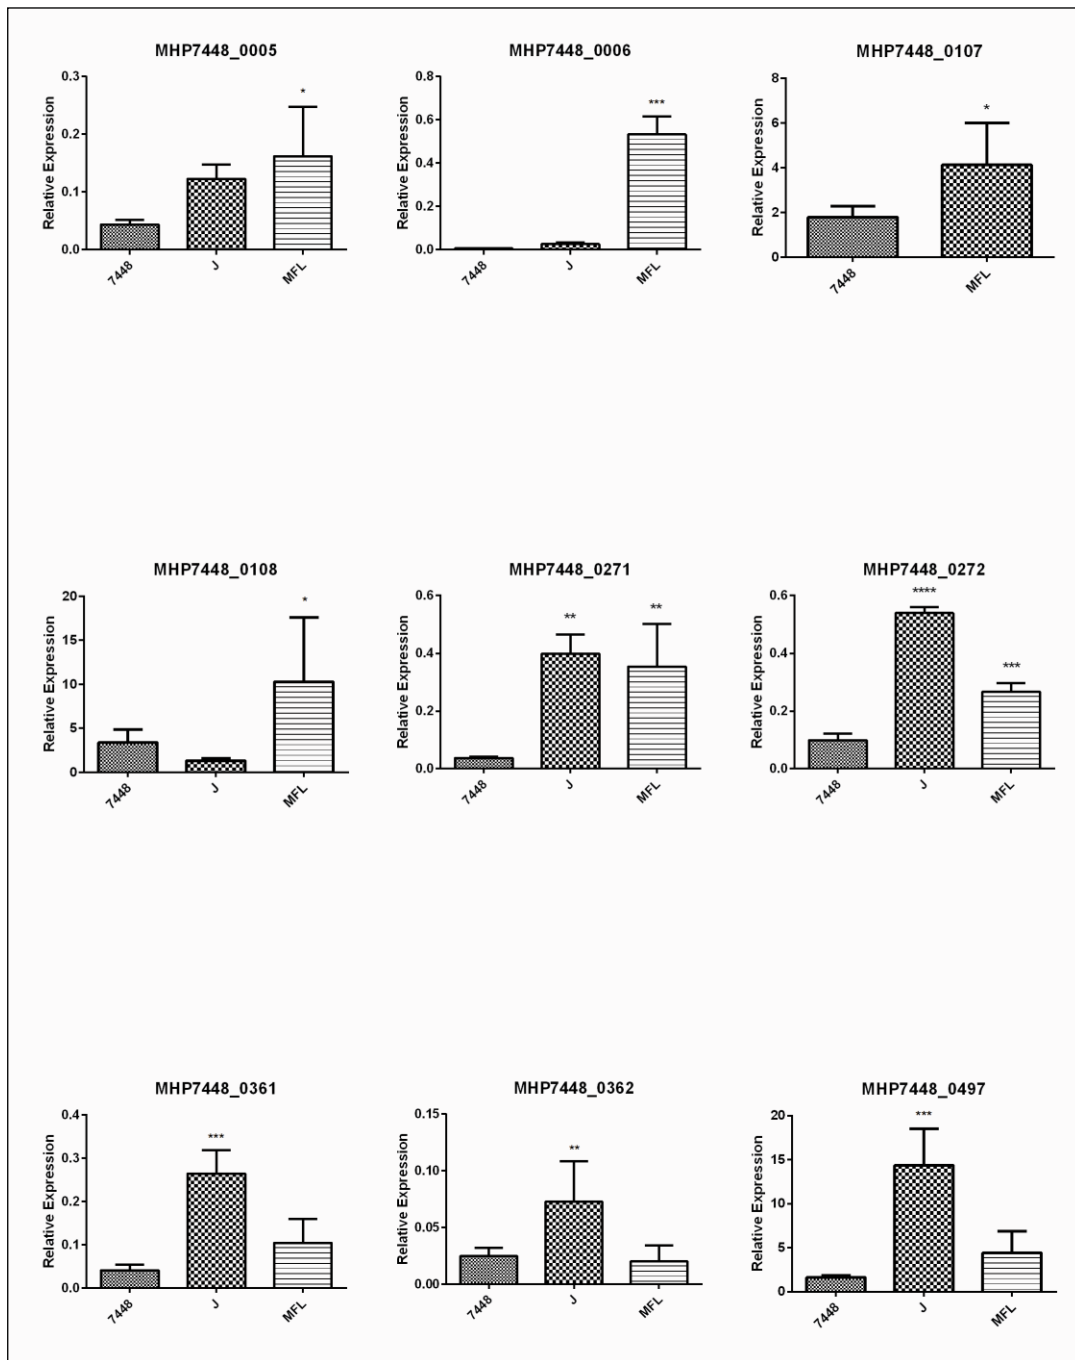

Asterisks indicate statistically significant differences in levels of expression, \* $0.01 < P < 0.05$ , \*\* $0.001 < P < 0.01$ , \*\*\* $P < 0.001$ . Abbreviations: *M. hyopneumoniae* strain 7448 (7448); *M. hyopneumoniae* strain J (J) and *M. flocculare* (MFL).
