# Supplementary material for: Repetitive Elements in Mycoplasma hyopneumoniae Transcriptional Regulation
Source: PubMed Central journal article supplement (PMC5179023; doi:10.1371/journal.pone.0168626), 2016-12-22
Supplement: pone.0168626.s003.pdf [file pone.0168626.s003.pdf]

Supplementary Table S1: Primers used in qPCR assays

| Target<br>(gene_name) | Primer_name | Sequence<br>(5'-3')       | Length<br>(bp) | TM<br>(°C) | Product<br>(bp) | Analysis |
|-----------------------|-------------|---------------------------|----------------|------------|-----------------|----------|
| MYF_00025             | 005_MFL_F   | GATCCAACCTTTTCTGCCACTTCA  | 24             | 56.0       | 156             | A        |
|                       | 005_MFL_R   | CGCAAATGTTCTTGACGACGTTG   | 23             | 57.3       |                 |          |
| MHP7448_0005          | 005 F       | GAACAGAAACAAGAAGTCGCTTTTT | 24             | 54.3       | 160             | A        |
|                       | 005 R       | GCATCGCCAATGTTTGCCAAA     | 21             | 57.6       |                 |          |
| MYF_00030             | 006_MFL_F   | CCTTCAAATTCTGTACGCCCAAT   | 24             | 57.7       | 162             | A        |
|                       | 006_MFL_R   | TAAATGACCGCCACCGCCTCA     | 21             | 61.4       |                 |          |
| MHP7448_0006          | 006 F       | GACCAGACGGGGATTGTATTGG    | 22             | 57.6       | 184             | A        |
|                       | 006 R       | GCATCAACAATTATCGCCAAAGAA  | 24             | 54.5       |                 |          |
| MYF_00550             | 107_MFL_F   | GATGCAAAGCCAACAAATCCGAGC  | 24             | 59.5       | 172             | A        |
|                       | 107_MFL_R   | GCGTCTCTTTGGACTTGCTGGA    | 23             | 59.7       |                 |          |
| MHP7448_0107          | 107 F       | AGCTTTATTCACTACCTTCAGCAC  | 24             | 55.0       | 165             | A        |
|                       | 107 R       | GTTGTTGGGCTGGCTCTGAC      | 21             | 59.0       |                 |          |
| MHP7448_0108          | 108 F       | CGGCGTCAGTCTGCCAAA        | 19             | 58.6       | 173             | A/T      |
|                       | 108 R       | CTCCGATTTTGCTCCATCTCGA    | 22             | 56.9       |                 |          |
| MHJ_0105              | 108_J F     | AATCAGAAACAGCTAAACCCGTGG  | 24             | 57.6       | 155             | A/T      |
|                       | 108_J R     | CTCCGATTTTGCTCCATCACGA    | 22             | 57.4       |                 |          |
| MYF_00575             | 108_MFL_F   | TGAAAGCGGAATTGGATTTTATGG  | 24             | 54.2       | 168             | A/T      |
|                       | 108_MFL_R   | GAGACTGCTTGTTGTGACCCG     | 21             | 58.3       |                 |          |
| MYF_00545             | 197_MFL_F   | GCAATCTTTCGGCGTAAAATACAG  | 24             | 54.8       | 175             | T        |
|                       | 197_MFL_R   | TTAAGGCGGTGGCAATCG        | 18             | 55.8       |                 |          |
| MHP7448_0197          | 197F        | TCGGAGAAAATTACAAAAACGCTC  | 24             | 54.1       | 168             | T        |
|                       | 197R        | CTAAGAACGCTGCTAAGGGCAG    | 22             | 57.9       |                 |          |
| MYF_01800             | 271_MFL_F   | TCACAGTAGTTTTGATGTTGCAGC  | 24             | 56.0       | 167             | A        |
|                       | 271_MFL_R   | CTTGGGTCAGTGTATTCTTTGCG   | 24             | 56.4       |                 |          |
| MHP7448_0271          | 271 F       | CATTTTCACGGCTTGATTCAGGGC  | 24             | 59.1       | 174             | A        |
|                       | 271 R       | GTCCTGCAATTCCTTGGATTGTGG  | 24             | 58.5       |                 |          |
| MHP7448_0272          | 272 F       | TCTAACTTGATTTTACGAGCACGC  | 24             | 55.5       | 163             | A/T      |
|                       | 272 R       | GCTCAGTTAATTTTGCCTCAAGAT  | 24             | 54.0       |                 |          |
| MYF_01805             | 272_MFL_F   | GAAAATTAGCGGGTTTGGGCA     | 21             | 56.4       | 182             | A/T      |
|                       | 272_MFL_R   | TTTCTGCAACAATAAGTTGTCCA   | 23             | 53.2       |                 |          |
| rpsP                  | 286 F       | CAACCCGTTCTACAAAATTGTCGT  | 24             | 56.0       | 163             | T        |
|                       | 286 R       | AACCGTTTGAGTTACTTGTGCG    | 22             | 56.0       |                 |          |
| MF01456               | 286_MFL_F   | CGACTTCAAAGAAAGGGTTCGA    | 22             | 55.2       | 191             | T        |
|                       | 286_MFL_R   | CTAACAGTGTGTCGATTGAGCG    | 24             | 56.3       |                 |          |
| MYF_01300             | 361_MFL_F   | CCAAGCGGGGTAGGAAAAACATC   | 23             | 58.4       | 159             | A        |
|                       | 361_MFL_R   | AGTTGGAATCTGGCTTAAAAACCC  | 24             | 55.8       |                 |          |
| MHP7448_0361          | 361 F       | CCAAGTGGTCAGGGCAAATCATC   | 23             | 58.4       | 159             | A        |
|                       | 361 R       | AGTAGCCGCTGACTTAAAAATCC   | 24             | 54.8       |                 |          |
| MYF_01305             | 362_MFL_F   | TGTTTCGATAATTCGCTTGCTTC   | 24             | 54.4       | 180             | A        |
|                       | 362_MFL_R   | ATTGCCGCTCATAAAATTGGGC    | 22             | 56.8       |                 |          |
| MHP7448_0362          | 362 F       | TACGATTAATAACACGCTTGCTGG  | 24             | 55.4       | 168             | A        |
|                       | 362 R       | CGCATCGGGTCGATTACAAAA     | 21             | 55.7       |                 |          |
| MHP7448_0397          | 397 F       | CCGCTGACTCTGACATCCTTTTGC  | 24             | 60.2       | 179             | T        |
|                       | 397 R       | GCACCAGAGGAACCAAACGGA     | 21             | 59.9       |                 |          |
| MF00009               | 397_MFL_F   | CAAAATAGCACTTCCAAAACGATT  | 24             | 52.6       | 174             | T        |
|                       | 397_MFL_R   | GGTATAATCCCATATTCCAAGTT   | 24             | 52.3       |                 |          |
| MHP7448_0484          | 484 F       | GTCTCTGGCTCTGAATTGGTCGG   | 23             | 59.5       | 188             | T        |
|                       | 484 R       | CGGGTTACCATAACTTACAGTCGC  | 24             | 57.4       |                 |          |
| MYF_00935             | 484_MFL_F   | TTCTGTGAATCTGAATTGGGCGA   | 23             | 56.7       | 160             | T        |
|                       | 484_MFL_R   | CCATCATCTCTGAACCTGAAAAA   | 24             | 55.1       |                 |          |
| MHP7448_0485          | 485 F       | ACGGTTCAATTTCCCTTAAAGAGC  | 24             | 55.7       | 158             | T        |
|                       | 485 R       | CTTTTCCCCTTGAAGATGTGGG    | 23             | 56.2       |                 |          |
| MF00865               | 485_MFL_F   | GGCAATCCGTTAAGCTCACG      | 20             | 56.5       | 165             | T        |
|                       | 485_MFL_R   | GGCAATTTCAAAGACGAATTTTTG  | 24             | 52.3       |                 |          |
| MYF_00885             | 497_MFL_F   | CGGTAGTGATGCCCAACAACAAA   | 23             | 58.0       | 163             | A        |
|                       | 497_MFL_R   | CCCCTCAGTATTGTGCTGTTTCAG  | 23             | 57.6       |                 |          |

|              |            |                           |    |      |     |    |
|--------------|------------|---------------------------|----|------|-----|----|
| MHP7448_0497 | 497 F      | GATCCAGTGGTGGAAAGTTCCTCAG | 24 | 59.0 | 175 | A  |
|              | 497 R      | GCTGGCTTTTCTGCTTCTTAGGC   | 24 | 58.8 |     |    |
| MHP7448_0505 | 505 F      | CCGAATTTTTGCTACTTCGCTTG   | 24 | 55.4 | 166 | T  |
|              | 505 R      | CGCTCACTTGAACCGAAAGTC     | 22 | 58.4 |     |    |
| MF00046      | 505_MFL F  | GCGAACAGACAATTATGGGTGTT   | 23 | 55.9 | 157 | T  |
|              | 505_MFL R  | GAGCCAGGCACAAGAACTGAATAG  | 24 | 57.8 |     |    |
| MHP7448_0525 | 525 F      | CCAAAAATGATTCCAGGGAA      | 20 | 56.3 | 190 | GR |
|              | 525 R      | GGCGTTTTAATTACACCGG       | 19 | 58.0 |     |    |
| MYF_00795    | 525_MFL_F  | GCCGCTTTTTCAAAATCTTGGTIT  | 21 | 55.5 | 160 | GR |
|              | 525_MFL_R  | GATATCAATCCACCAAAACGGTT   | 24 | 53.9 |     |    |
| MHP7448_0623 | 623 F      | TCGAAGACACTTTGGCAAACA     | 21 | 55.1 | 165 | T  |
|              | 623 R      | CCAATGCAACTTTTTGTTTTTCGC  | 24 | 54.9 |     |    |
| MYF_02820    | 623_MFL F  | GTGAAAAACAGAAAATTGCACTTG  | 24 | 52.2 | 171 | T  |
|              | 623_MFL R  | CTTCTGGAATATGATGGCTTACAA  | 24 | 52.9 |     |    |
| MHP7448_0081 | 81 F       | CGAGACAAAAAGGTTCAAAAAG    | 22 | 57.1 | 171 | GR |
|              | 81 R       | GTA AAAAGGGATGTGCCTGC     | 20 | 60.4 |     |    |
| MF01193      | 81_MFL_F   | GGGCTGATTTTAACGGGTGCTT    | 22 | 58.2 | 162 | GR |
|              | 81_MFL_R   | CGGAGCAACGCTTTGAAAAGTCTC  | 24 | 58.8 |     |    |
| MHP7448_0087 | 87 F       | GTTGTCGGAGTGCCTAACACTGG   | 23 | 59.9 | 154 | T  |
|              | 87 R       | GCAATAGGATACCTGGGGTGTC    | 22 | 57.2 |     |    |
| MF01266      | 87_MFL F   | CGGGAATTTTGCCACCTAAA      | 20 | 53.5 | 183 | T  |
|              | 87_MFL R   | CAGCCTCATTTTCAGCAGGTTT    | 22 | 56.1 |     |    |
| <i>deoC</i>  | deoC F     | GCTTTGATTGCCAATTTTTCG     | 21 | 56.7 | 163 | GR |
|              | deoC R     | CAGCCCTTTTATCACCTCATG     | 21 | 60.6 |     |    |
| <i>deoC</i>  | deoC_MFL_F | GCCAGTTTGGGTTAGGCTTG      | 20 | 56.7 | 160 | GR |
|              | deoC_MFL_R | CATTACCATGTCAATTTTCGTCAGC | 24 | 54.7 |     |    |
| <i>glyA</i>  | glyA_MFL F | GTGGCTATTCTGCTTATTCAGGGA  | 24 | 56.7 | 168 | T  |
|              | glyA_MFL R | GGGTTGTGGCGGTTATCACATG    | 22 | 58.7 |     |    |
| <i>glyA</i>  | glyAF      | TTGATTTTGCCGCTTTCGAC      | 21 | 56.7 | 170 | T  |
|              | glyAR      | GCCACCTCTTGGTCTCTCAAAG    | 23 | 59.6 |     |    |
| <i>lon</i>   | lon F      | TAAAACTTCAAGCATCGCCG      | 20 | 58.4 | 165 | GR |
|              | lon R      | GAAATCCGAGGACATCGCC       | 19 | 62.3 |     |    |
| <i>lon</i>   | lon_MFL_F  | CGGGCGTGGGGATATTAATACTAAC | 24 | 57.6 | 176 | GR |
|              | lon_MFL_R  | AAGGTCCATCTTTTGGAATTGCC   | 23 | 56.0 |     |    |
| <i>sipS</i>  | sipS F     | CGCTCACTTGAACCGAAAGTC     | 22 | 55.6 | 179 | T  |
|              | sipS R     | CCTTCGGGAATAACTCCGTAA     | 22 | 54.4 |     |    |
| MYF_01338    | sipS_MFL F | GTGGTTTTCAAATATAAGGAGCAA  | 24 | 51.8 | 167 | T  |
|              | sipS_MFL R | AATTTACCTTCAGGAATTGTGCC   | 23 | 53.8 |     |    |
| <i>upp</i>   | upp F      | GGCTCTAAAACAATCGCAACTG    | 22 | 60.8 | 153 | GR |
|              | upp R      | CGGTTTGGGTATGCTTGACTC     | 21 | 62.6 |     |    |
| <i>upp</i>   | upp_MFL_F  | CAACACAAGTTGTTTTTACCCCG   | 23 | 55.1 | 173 | GR |
|              | upp_MFL_R  | GGCAACAGAATCGGCATCAGG     | 21 | 58.8 |     |    |

Primers were used in the follow analysis: Adhesins coding genes (A), Tandem repeats (T) and establishment of gene reference (GR) used in  $2^{-\Delta Ct}$  calculus. Primers used for *M. hyopneumoniae* strain 7448 were the same used for strain J, except for gene MHP7448\_0108.
