# Supplementary material for: Repetitive Elements in Mycoplasma hyopneumoniae Transcriptional Regulation
Source: PubMed Central journal article supplement (PMC5179023; doi:10.1371/journal.pone.0168626), 2016-12-22
Supplement: pone.0168626.s007.pdf [file pone.0168626.s007.pdf]

Supplementary Table S5: Presence of repeat elements on upstream regions of regulated genes in *M. hyopneumoniae* strain 232

| Gene_name | MHP_232                                  | MHP_7448     | MHP_7448 x<br>MHP_232     | $\Delta G^2$ |
|-----------|------------------------------------------|--------------|---------------------------|--------------|
|           | Product                                  | Gene_name    | Conservation <sup>1</sup> |              |
| mhp004    | hypothetical protein                     | MHP7448_004  | 5/5 (100%)                | -8.06        |
| mhp024    | hypothetical protein                     | MHP7448_022  | 2/2 (100%)                | -2.14        |
| atpB      | ATP synthase A chain                     | atpB         | 2/2 (100%)                | -5.61        |
| glyS      | glycyl-tRNA synthetase                   | glyS         |                           |              |
| mhp232    | hypothetical protein                     | MHP7448_0685 | 0/1 (0%)                  | *            |
| spoU      | rRNA methylase                           | spoU         | 0/1 (0%)                  | *            |
| mglA      | ATP-binding protein                      | mglA         | 2/2 (100%)                | -6.32        |
| mhp325    | hypothetical protein                     | MHP7448_0312 | 4/5 (80%)                 | -2.61        |
| mhp326    | hypothetical protein                     | MHP7448_0313 | 5/5 (100%)                | -4.34        |
| mhp355    | hypothetical protein                     | MHP7448_0344 | 4/4 (100%)                | -4.85        |
| mhp366    | hypothetical protein                     | MHP7448_0355 | 2/2 (100%)                | -3.33        |
| mhp516    | hypothetical protein                     | MHP7448_0518 | 1/4 (25%)                 | -3.13        |
| mhp623    | hypothetical protein                     | MHP7448_0604 | 4/5 (80%)                 | -4.18        |
| ftsY      | cell division protein                    | ftsY         | 2/2 (100%)                | -5.09        |
| gatA      | glutamyl-tRNA amidotransferase subunit A | gatA         | 0/5 (0%)                  | *            |
| mhp115    | ABC transporter ATP binding protein      | MHP7448_0272 | 5/7 (71%)                 | -3.59        |
| rpl4      | 50s ribosomal protein L4                 | rplD         | 6/6 (100%)                | -3.82        |
| rpl23     | 50s ribosomal protein L23                | rplW         |                           |              |
| mhp262    | hypothetical protein                     | MHP7448_0118 | 4/4 (100%)                | -6.09        |
| pfkA      | 6-phosphofructokinase                    | pfkA         | 1/1 (100%)                | -2.90        |
| mhp293    | hypothetical protein                     | MHP7448_0331 | 0/3 (0%)                  | *            |
| mhp424    | hypothetical protein                     | MHP7448_408  | 2/2 (100%)                | -2.34        |
| mhp451    | hypothetical protein                     | MHP7448_452  | 3/3 (100%)                | -6.91        |
| mhp452    | hypothetical protein                     | MHP7448_453  | 0/3 (0%)                  | *            |
| napA      | neutrophil activating protein            | napA         | 3/3 (100%)                | -4.83        |
| gyrA      | DNA gyrase subunit A                     | gyrA         | 6/6 (100%)                | -3.79        |
| secA      | preprotein translocase subunit           | MHP7448_0086 | 4/5 (80%)                 | -7.33        |
| mhp019    | hypothetical protein                     | MHP7448_017  | 0/3 (0%)                  | *            |
| mhp027    | hypothetical protein                     | MHP7448_025  | 4/4 (100%)                | -3.08        |
| mhp324    | hypothetical protein                     | MHP7448_0311 | 4/4 (100%)                | -2.55        |
| aprE      | subtilisin-like serine protease          | MHP7448_0332 | 2/4 (50%)                 | -4.48        |
| mhp354    | hypothetical protein                     | MHP7448_0342 | 6/7 (86%)                 | -9.34        |
| mhp360    | hypothetical protein                     | MHP7448_0349 | 4/4 (100%)                | -2.76        |
| gap       | glyceraldehyde 3-phosphate dehydrogenase | MHP7448_035  | 3/3 (100%)                | -4.70        |
| mhp630    | hypothetical protein                     | MHP7448_0611 | 4/4 (100%)                | -4.03        |
| rpsG      | 30s ribosomal protein S7                 | MHP7448_076  | 1/1 (100%)                | -2.30        |
| rps17     | 30s ribosomal protein S17                | MHP7448_185  | 6/6 (100%)                | -3.82        |
| mhp093    | hypothetical protein                     | MHP7448_287  | 5/6 (83%)                 | -7.85        |
| yx1       | hypothetical protein                     | MHP7448_498  | 5/6 (83%)                 | -5.62        |

|        |                                                               |              |            |        |
|--------|---------------------------------------------------------------|--------------|------------|--------|
| mhp508 | hypothetical protein                                          | MHP7448_511  | 2/2 (100%) | -0.67  |
| mhp561 | hypothetical protein                                          | MHP7448_544  | 1/4 (25%)  | -2.74  |
| mhp662 | hypothetical protein                                          | MHP7448_642  | 3/4 (75%)  | -7.42  |
| mhp371 | putative high affinity transport system protein p37 precursor | MHP7448_0360 |            |        |
| potA   | ABC transporter ATP-binding protein                           | MHP7448_0369 | 3/5 (60%)  | -0.87  |
| ugpA   | sn-glycerol-3-phosphate transport system permease             | MHP7448_0370 |            |        |
| fusA   | GTP-binding protein chain elongation factor ef-g              | fusA         | 4/5 (80%)  | -1.12  |
| trsE   | transfer complex protein                                      | MHP7448_0247 | 5/5 (100%) | -10.43 |
| mhp118 | hypothetical protein                                          | MHP7448_0261 | 2/2 (100%) | -2.99  |
| mhp395 | hypothetical protein                                          | MHP7448_0383 | 1/5 (20%)  | -3.59  |
| mhp629 | hypothetical protein                                          | MHP7448_0610 | 3/3 (100%) | -7.07  |
| mhp092 | hypothetical protein                                          | MHP7448_340  | 1/4 (25%)  | -2.12  |
| oppD   | oligopeptide transport system permease protein                | MHP7448_502  | 5/6 (83%)  | -5.62  |
| pgiB   | phosphoglucose isomerase B                                    | MHP7448_531  | 1/2 (50%)  | -2.03  |
| pyrH   | uridylate kinase                                              | MHP7448_535  | 2/2 (100%) | -6.29  |
| mhp576 | hypothetical protein                                          | MHP7448_556  | 0/3 (0%)   | *      |
| mhp654 | hypothetical protein                                          | MHP7448_633  | 7/7 (100%) | -4.31  |
| p115   | p115 protein                                                  | MHP7448_657  | 1/1 (100%) | -3.88  |
| nrdE   | ribonucleoside-diphosphate reductase alpha chain              | nrdE         | 2/5 (40%)  | -2.23  |
| mhp130 | putative DNA processing protein                               | smf          | 5/5 (100%) | -10.43 |
| truB   | tRNA pseudouridine synthase B                                 | truB         | 1/1 (100%) | -3.26  |
| mhp170 | hypothetical protein                                          | MHP7448_0211 | 2/3 (67%)  | -1.70  |
| oppF   | oligopeptide transport system permease protein                | oppF-1       |            |        |
| rp15   | 50s ribosomal protein L5                                      | MHP7448_0182 |            |        |
| rps8   | 30s ribosomal protein S8                                      | rpsH         | 6/6 (100%) | -3.82  |
| adk    | adenylate kinase                                              | adk          |            |        |
| mhp247 | hypothetical protein                                          | MHP7448_0135 | 1/1 (100%) | -0.62  |
| mhp273 | hypothetical protein                                          | MHP7448_0106 | 1/3 (33%)  | -1.91  |
| mhp303 | hypothetical protein                                          | MHP7448_0342 | 2/7 (29%)  | -0.89  |
| gtp1   | GTP-binding protein                                           | ychF         | 2/2 (100%) | -4.04  |
| rps18  | 30s ribosomal protein S18                                     | rpsR         |            |        |
| mhp517 | hypothetical protein                                          | MHP7448_0519 | 1/1 (100%) | -2.02  |
| mhp309 | hypothetical protein                                          | MHP7448_297  | 0/1 (0%)   | *      |
| mhp312 | hypothetical protein                                          | MHP7448_299  | 2/2 (100%) | -3.28  |
| mhp341 | hypothetical protein                                          | MHP7448_330  | 1/1 (100%) | -0.70  |
| mhp362 | hypothetical protein                                          | MHP7448_351  | 3/3 (100%) | -1.39  |
| rluD   | ribosomal large subunit pseudouridine synthase D              | MHP7448_458  | 4/4 (100%) | -4.83  |
| mhp472 | hypothetical protein                                          | MHP7448_474  | 4/4 (100%) | -6.68  |
| mhp480 | hypothetical protein                                          | MHP7448_482  | 6/6 (100%) | -3.87  |
| mhp583 | hypothetical protein                                          | MHP7448_566  | 1/4 (25%)  | -3.61  |
| mhp634 | hypothetical protein                                          | MHP7448_0615 | 4/4 (100%) | -4.03  |
| rpL    | 50s ribosomal protein L7/112                                  | MHP7448_0618 |            |        |

|        |                                                 |              |            |       |
|--------|-------------------------------------------------|--------------|------------|-------|
| rpoC   | DNA-directed RNA polymerase beta chain          | MHP7448_0616 | 1/1 (100%) | -1.72 |
| cysS   | cysteinyl-tRNA synthetase                       | MHP7448_641  | 3/4 (75%)  | -7.42 |
| mhp670 | hypothetical protein                            | MHP7448_649  | 1/4 (25%)  | -7.32 |
| mhp140 | hypothetical protein                            | MHP7448_0240 | 6/6 (100%) | -2.49 |
| glpQ   | glycerophosphoryl diester phosphodiesterase     | ugpQ         | 2/2 (100%) | -3.28 |
| ackA   | acetate kinase                                  | ackA         | 4/4 (100%) | -4.92 |
| mhp510 | hypothetical protein                            | MHP7448_0512 |            |       |
| atpG   | ATP synthase gamma chain                        | atpG         | 2/2 (100%) | -5.61 |
| tsf    | elongation factor ts                            | tsf          |            |       |
| dnaN   | DNA polymerase III, beta chain                  | dnaN         | 2/2 (100%) | -3.59 |
| hpt    | hypoxanthine phosphoribosyl transferase         | hpt          | 2/2 (100%) | -2.99 |
| mhp006 | hypothetical protein                            | MHP7448_006  | 5/5 (100%) | -8.06 |
| mhp022 | ABC transporter ATP binding protein             | MHP7448_020  | 1/1 (100%) | -1.32 |
| mhp639 | hypothetical protein                            | MHP7448_0620 | 4/4 (100%) | -4.32 |
| ushA   | 5'-nucleotidase                                 | MHP7448_0630 | 7/7 (100%) | -6.04 |
| mhp666 | hypothetical protein                            | MHP7448_0646 | 3/4 (75%)  | -7.42 |
| mhp087 | hypothetical protein                            | MHP7448_079  | 0/4 (0%)   | *     |
| mhp411 | hypothetical protein                            | MHP7448_397  | 2/2 (100%) | -5.40 |
| metK   | S-adenosylmethionine synthetase                 | MHP7448_451  | 1/1 (100%) | -9.21 |
| nrdF   | ribonucleoside-diphosphate reductase beta chain | nrdF         | 2/4 (50%)  | -4.53 |
| rpl2   | 50s ribosomal protein L2                        | rplB         | 1/1 (100%) | -3.77 |
| rpsL   | 30s ribosomal protein S12                       | rpsN         | 2/2 (100%) | -3.26 |
| smpB   | SsrA-binding protein                            | smpB         | 2/2 (100%) | -1.16 |
| topA   | DNA topoisomerase I (omega-protein)             | topA         | 5/6 (83%)  | -7.85 |
| rps19  | 30s ribosomal protein S19                       | rpsS         |            |       |
| rpl14  | 50s ribosomal protein L14                       | rplN         |            |       |
| rpl6   | 50s ribosomal protein L6                        | rplF         | 6/6 (100%) | -3.82 |
| rps5   | 30s ribosomal protein S5                        | rpsE         |            |       |
| rpoA   | DNA-directed RNA polymerase alpha chain         | rpoA         |            |       |
| mhp377 | putative lipoprotein                            | MHP7448_0366 | 4/5 (80%)  | -4.52 |
| mhp401 | hypothetical protein                            | MHP7448_389  | 1/1 (100%) | -0.34 |
| mhp429 | hypothetical protein                            | MHP7448_411  | 4/7 (57%)  | -5.47 |
| mhp434 | hypothetical protein                            | MHP7448_431  | 3/5 (60%)  | -2.74 |
| atpA   | ATP synthase alpha chain                        | atpA         |            |       |
| mhp478 | hypothetical protein                            | MHP7448_480  | 6/6 (100%) | -3.87 |
| mhp481 | hypothetical protein                            | MHP7448_483  |            |       |
| mhp482 | hypothetical protein                            | MHP7448_484  | 6/6 (100%) | -3.87 |
| mhp284 | hypothetical protein                            | MHP7448_0095 | 1/4 (25%)  | -5.86 |
| mhp236 | chromate transport protein, putative            | MHP7448_0146 | 1/4 (25%)  | -2.03 |
| mhp350 | hypothetical protein                            | MHP7448_0338 | 1/4 (25%)  | +0.20 |
| mhp077 | hypothetical protein                            | MHP7448_071  | 1/1 (100%) | -0.32 |
| p146   | p146 adhesin like-protein, p97 paralog          | MHP7448_663  | 7/7 (100%) | -4.79 |
| pepP   | xaa-pro aminopeptidase                          | pepP         | 2/2 (100%) | -3.24 |

|        |                                                                                                 |                  |            |       |
|--------|-------------------------------------------------------------------------------------------------|------------------|------------|-------|
| polC   | DNA polymerase III, alpha chain                                                                 | polC             | 2/2 (100%) | -6.29 |
| mhp405 | hypothetical protein                                                                            | MHP7448_391      |            |       |
| mhp406 | hypothetical protein                                                                            | MHP7448_392      | 7/7 (100%) | -3.98 |
| ftsZ   | cell division protein                                                                           | MHP7448_393      |            |       |
| mhp461 | hypothetical protein                                                                            | MHP7448_463      | 5/5 (100%) | -3.83 |
| ktrA   | potassium uptake protein                                                                        | MHP7448_545      | 5/5 (100%) | -3.89 |
| nagE   | pts system, n-acetylglucosamine-specific enzyme II, ABC component                               | MHP7448_574      | 0/1 (0%)   | -1.76 |
| pdhD   | dihydrolipoamide dehydrogenase                                                                  | pdhD             | 5/5 (100%) | -3.14 |
| parC   | topoisomerase IV subunit A                                                                      | parC             |            |       |
| lspA   | lipoprotein signal peptidase (prolipoprotein signal peptidase) (signal peptidase II) (spase II) | lps              | 3/3 (100%) | -4.40 |
| mhp057 | hypothetical protein                                                                            | MHP7448_054      | 4/4 (100%) | -5.84 |
| mhp064 | hypothetical protein                                                                            | MHP7448_061      | 2/2 (100%) | -5.61 |
| mhp069 | hypothetical protein                                                                            | MHP7448_065      | 0/1 (0%)   | *     |
| mhp071 | hypothetical protein                                                                            | MHP7448_0681     |            |       |
| lepA   | 30 kda GTP-binding protein lepA                                                                 | MHP7448_072      | 2/2 (100%) | -3.33 |
| dnaK   | chaperone protein dnaK                                                                          | dnaK             | 3/2 (100%) | -4.74 |
| serS   | seryl-tRNA synthetase                                                                           | serS             | 6/6 (100%) | 10.73 |
| mhp144 | putative dehydrogenase                                                                          | MHP7448_0235     |            |       |
| mhp145 | putative D-ribose-binding protein mutant                                                        | rbsB             |            |       |
| mhp148 | hypothetical protein                                                                            | iolE             |            |       |
| iolD   | myo-inositol catabolism                                                                         | iolD             | 6/6 (100%) | -5.57 |
| mhp150 | hypothetical protein                                                                            | MHP7448_0228     |            |       |
| mhp151 | hypothetical protein                                                                            | iolB             |            |       |
| iolC   | myo-inositol catabolism                                                                         | iolC             |            |       |
| rbsA   | ribose transport ATP-binding protein                                                            | mgIA             | 1/2 (50%)  | +0.17 |
| mhp171 | ABC transporter ATP binding protein                                                             | MHP7448_0210     | 3/4 (75%)  | -2.35 |
| map    | methionine amino peptidase                                                                      | map              |            |       |
| rps11  | 30s ribosomal protein S11                                                                       | rpsK             | 6/6 (100%) | -3.82 |
| rpl17  | 50s ribosomal protein L17                                                                       | rplQ             |            |       |
| clpB   | ATP-dependent serine proteinase, 24 protein                                                     | clpB             | 4/4 (100%) | -3.90 |
| glpF   | glycerol uptake facilitator protein                                                             | glpF             | 1/1 (100%) | -1.91 |
| glpK   | glycerol kinase (ATP:glycerol 3-phosphotransferase) (glycerokinase)                             | glpK             | 3/4 (75%)  | -1.84 |
| mhp289 | hypothetical protein                                                                            | MHP7448_0090     | 5/5 (100%) | -2.19 |
| mhp275 | hypothetical protein, p102 paralog                                                              | MHP7448_0105 (P) | 0/1 (0%)   | *     |
| mhp271 | p97 cilium adhesin paralog                                                                      | MHP7448_0108     | 3/3 (100%) | -4.65 |
| mhp254 | hypothetical protein                                                                            | MHP7448_0127     | 1/1 (100%) | -1.39 |
| mhp334 | hypothetical protein                                                                            | MHP7448_0319     | 5/5 (100%) | -4.34 |
| mhp374 | hypothetical protein                                                                            | MHP7448_0363     | 1/1 (100%) | -0.25 |
| mhp399 | hypothetical protein                                                                            | MHP7448_386      | 4/4 (100%) | -6.17 |
| mhp445 | hypothetical protein                                                                            | MHP7448_443      | 4/5 (80%)  | -7.93 |
| mhp479 | hypothetical protein                                                                            | MHP7448_481      | 6/6 (100%) | -3.87 |
| asnS   | asparaginyl-tRNA synthetase                                                                     | MHP7448_500      | 2/3 (67%)  | -3.02 |

|        |                                                        |              |            |        |
|--------|--------------------------------------------------------|--------------|------------|--------|
| rplK   | 50s ribosomal protein L11                              | rplK         | 2/2 (100%) | -3.24  |
| rps13  | 30s ribosomal protein S13                              | rpsM         | 2/3 (67%)  | -10.66 |
| tpiA   | triosephosphate isomerase                              | tpiA         | 2/5 (40%)  | -3.73  |
| oppC   | oligopeptide transport system permease protein         | oppC         | 5/6 (83%)  | -5.62  |
| oppB   | oligopeptide transport system permease protein         | oppB         |            |        |
| P46    | 46kd surface antigen precursor                         | MHP7448_0513 | 5/5 (100%) | -5.49  |
| mhp005 | hypothetical protein                                   | MHP7448_005  |            |        |
| mhp013 | hypothetical protein                                   | MHP7448_013  | 5/5 (100%) | -8.06  |
| rluC   | ribosomal large subunit pseudouridine synthase         | rluC         |            |        |
| acpD   | acyl carrier protein phosphodiesterase                 | acpD-1       | 4/4 (100%) | -4.83  |
| gatB   | glutamyl-tRNA amidotransferase, subunit B              | gatB         | 0/5 (0%)   | *      |
| metG   | methionyl-tRNA synthetase                              | metS         | 7/7 (100%) | -3.98  |
| mhp337 | hypothetical protein                                   | MHP7448_0089 | 2/2 (100%) | -4.18  |
| mhp240 | hypothetical protein                                   | MHP7448_0142 | 0/1 (0%)   | -      |
| mhp235 | hypothetical protein                                   | MHP7448_0147 | 1/4 (25%)  | -2.03  |
| mhp023 | ABC transporter ATP binding protein                    | MHP7448_021  | 4/4 (100%) | -3.08  |
| mhp136 | hypothetical protein                                   | MHP7448_0244 | 1/1 (100%) | -3.71  |
| mod    | site-specific DNA-methyltransferase (adenine-specific) | MHP7448_0316 | 0/1 (0%)   | -3.11  |
| mhp353 | hypothetical protein                                   | MHP7448_0341 | 1/4 (25%)  | -2.12  |
| mhp373 | putative transport system permease protein p69         | MHP7448_0362 | 3/5 (60%)  | -0.87  |
| mhp393 | hypothetical protein                                   | MHP7448_0381 | 3/5 (60%)  | -3.59  |
| mhp310 | hypothetical protein                                   | MHP7448_297  | 0/1 (0%)   | *      |
| mhp419 | hypothetical protein                                   | MHP7448_404  | 2/6 (33%)  | -1.14  |
| proS   | prolyl aminoacyl-tRNA synthetase                       | proS         | 2/5 (40%)  | -2.12  |
| rpsT   | 30s ribosomal protein S20                              | rpsT         | 2/2 (100%) | -1.39  |
| mhp038 | hypothetical protein                                   | VacB         | 2/2 (100%) | -5.91  |
| mhp465 | hypothetical protein                                   | MHP7448_467  |            |        |
| mhp466 | hypothetical protein                                   | MHP7448_468  |            |        |
| bcrA   | ABC transporter ATP binding protein                    | MHP7448_469  | 4/4 (100%) | -6.01  |
| mhp468 | hypothetical protein                                   | MHP7448_470  |            |        |
| mgtE   | Mg <sup>2+</sup> ion transporter                       | mgtE         | 6/6 (100%) | -2.93  |
| mhp509 | hypothetical protein                                   | MHP7448_0713 | 4/4 (100%) | -4.92  |
| mhp474 | hypothetical protein                                   | MHP7448_476  | 2/2 (100%) | -2.82  |
| mhp486 | hypothetical protein                                   | MHP7448_488  | 4/4 (100%) | -7.02  |
| mhp584 | hypothetical protein                                   | MHP7448_567  | 1/4 (25%)  | -0.90  |
| polA   | DNA polymerase I                                       | MHP7448_581  | 6/6 (100%) | -7.98  |
| mhp619 | hypothetical protein                                   | MHP7448_0600 |            |        |
| mhp620 | hypothetical protein                                   | MHP7448_0601 | 0/1 (0%)   | *      |
| mhp621 | hypothetical protein                                   | MHP7448_0602 |            |        |
| mhp674 | hypothetical protein                                   | MHP7448_653  | 2/3 (67%)  | -3.24  |

<sup>1</sup>Conservation was determined by dividing number of elements found in MHP\_232 by number of elements in MHP\_7448. <sup>2</sup> $\Delta G$  represents the best values found among all palindrome elements conserved between MHP\_7448 and MHP\_232. Abbreviations: MHP\_232 – *M. hyopneumoniae* strain 232; MHP\_7448 – *M. hyopneumoniae* strain 7448.
