# Supplementary material for: Repetitive Elements in Mycoplasma hyopneumoniae Transcriptional Regulation
Source: PubMed Central journal article supplement (PMC5179023; doi:10.1371/journal.pone.0168626), 2016-12-22
Supplement: pone.0168626.s009.pdf [file pone.0168626.s009.pdf]

| <b>Supplementary Table S7: DNA repeats located in UTR regions</b> |                              |                             |                                |               |                            |
|-------------------------------------------------------------------|------------------------------|-----------------------------|--------------------------------|---------------|----------------------------|
| <b>Gene</b>                                                       | <b>TSS (+1)<sup>a*</sup></b> | <b>TSS_Gap<sup>b*</sup></b> | <b>Start Codon<sup>*</sup></b> | <b>REP_ID</b> | <b>REP_Gap<sup>c</sup></b> |
| sipS                                                              | G                            | 59                          | ATT                            | palG_E_245    | 39                         |
| sipS                                                              |                              |                             |                                | palG_ES_52    | 2                          |
| recA                                                              | A                            | 71                          | TTA                            | palG_E_252    | 68                         |
| uvrC                                                              | A                            | 77                          | ATG                            | palG_E_833    | 66                         |
| uvrC                                                              |                              |                             |                                | palG_ES_60    | 19                         |
| clpB                                                              | T                            | 16                          | TTA                            | palG_E_853    | 12                         |
| rpsJ                                                              | G                            | 68                          | ATG                            | palG_E_333    | 56                         |
| rpsJ                                                              |                              |                             |                                | palG_E_892    | 6                          |
| MHP7448_0198                                                      | G                            | 137                         | ATG                            | palG_E_339    | 110                        |
| MHP7448_0198                                                      |                              |                             |                                | palG_E_896    | 150                        |
| MHP7448_0198                                                      |                              |                             |                                | palG_S_1197   | 45                         |
| MHP7448_0225                                                      | G                            | 87                          | ATG                            | palG_E_358    | 73                         |
| MHP7448_0225                                                      |                              |                             |                                | palG_E_359    | 40                         |
| MHP7448_0225                                                      |                              |                             |                                | palG_E_906    | 13                         |
| MHP7448_0272                                                      | A                            | 56                          | ATC                            | palG_E_925    | 30                         |
| MHP7448_0360                                                      | A                            | 143                         | ATG                            | palG_E_474    | 36                         |
| MHP7448_0360                                                      |                              |                             |                                | palG_ES_134   | 3                          |
| pgk                                                               | A                            | 25                          | ATG                            | palG_E_1051   | 12                         |
| MHP7448_0513                                                      | G                            | 35                          | ATG                            | palG_E_589    | 36                         |
| pyrH                                                              | A                            | 16                          | ATG                            | palG_E_1077   | 14                         |
| rplJ                                                              | A                            | 100                         | TTG                            | palG_ES_218   | 0                          |
| rplJ                                                              |                              |                             |                                | SSRM_235_L    | 84                         |
| dam                                                               | A                            | 14                          | TTA                            | palG_E_1119   | 4                          |
| MHP7448_0663                                                      | A                            | 34                          | ATG                            | palG_E_1145   | 12                         |

<sup>a</sup>Transcription Start Sites (+1)

<sup>b</sup>Distance (nucleotides) between the TSS and the start codon

<sup>c</sup>Distance (nucleotides) between the REP and the start codon

\*Data from Weber et al. 2012
